# Supplementary material for: Exploring the Multi-Target Performance of Mitochondriotropic Antioxidants against the Pivotal Alzheimer’s Disease Pathophysiological Hallmarks
Source: PubMed Central journal article supplement (PMC7024345; doi:10.3390/molecules25020276), 2020-01-09
Supplement: molecules-25-00276-s001.pdf [file molecules-25-00276-s001.pdf]

**Table 1.** Data are means  $\pm$  standard deviation (SD) and the results are expressed as % of control (CTRL = 100%) from three independent experiments (n = 3).

|                           | Control           | Glutamate<br>(16 mM) | Compound 7       |                  | Compound 11      |
|---------------------------|-------------------|----------------------|------------------|------------------|------------------|
|                           |                   |                      | 10 $\mu$ M       | 50 $\mu$ M       | 10 $\mu$ M       |
| MTT reduction<br>(% ctrl) | 100.00 $\pm$ 4.83 | 72.68 $\pm$ 2.81     | 84.24 $\pm$ 5.32 | 81.90 $\pm$ 2.81 | 74.97 $\pm$ 6.87 |

  

|                           | Control           | Iron(III)<br>(1 mM) | Compound 7       |                   | Compound 11      |
|---------------------------|-------------------|---------------------|------------------|-------------------|------------------|
|                           |                   |                     | 10 $\mu$ M       | 50 $\mu$ M        | 10 $\mu$ M       |
| MTT reduction<br>(% ctrl) | 100.00 $\pm$ 5.31 | 63.06 $\pm$ 6.25    | 75.90 $\pm$ 5.25 | 80.22 $\pm$ 12.76 | 82.87 $\pm$ 7.87 |

  

|                           | Control           | A $\beta$<br>(25 $\mu$ M) | Compound 7       |                  | Compound 11      |
|---------------------------|-------------------|---------------------------|------------------|------------------|------------------|
|                           |                   |                           | 10 $\mu$ M       | 50 $\mu$ M       | 10 $\mu$ M       |
| MTT reduction<br>(% ctrl) | 100.00 $\pm$ 1.67 | 58.73 $\pm$ 2.76          | 72.55 $\pm$ 2.67 | 68.81 $\pm$ 0.70 | 66.43 $\pm$ 3.45 |

**Table 2.** Values obtained from statistical data.

|                                                        | Control | Glutamate<br>(16 mM) | Compound 7 |            | Compound 11 |
|--------------------------------------------------------|---------|----------------------|------------|------------|-------------|
|                                                        |         |                      | 10 $\mu$ M | 50 $\mu$ M | 10 $\mu$ M  |
| <i>D'Agostino &amp; Pearson omnibus normality test</i> |         |                      |            |            |             |
| K2                                                     | 1.348   | 0.7907               | 6.693      | 1.545      | 16.37       |
| P value                                                | 0.5096  | 0.6735               | 0.0352     | 0.4618     | 0.0003      |
| <i>Shapiro-Wilk normality test</i>                     |         |                      |            |            |             |
| W                                                      | 0.9297  | 0.9052               | 0.8338     | 0.9328     | 0.7429      |
| P value                                                | 0.5135  | 0.2839               | 0.0492     | 0.5084     | 0.0045      |
| <i>KS normality test</i>                               |         |                      |            |            |             |
| KS distance                                            | 0.9297  | 0.9052               | 0.8338     | 0.9328     | 0.7429      |
| P value                                                | 0.5135  | 0.2839               | 0.0492     | 0.5084     | 0.0045      |

  

|                                                        | Control | Iron(III)<br>(1 mM) | Compound 7 |            | Compound 11 |
|--------------------------------------------------------|---------|---------------------|------------|------------|-------------|
|                                                        |         |                     | 10 $\mu$ M | 50 $\mu$ M | 10 $\mu$ M  |
| <i>D'Agostino &amp; Pearson omnibus normality test</i> |         |                     |            |            |             |
| K2                                                     | 2.705   | 5.496               | 6.409      | 4.708      | 0.4683      |
| P value                                                | 0.2586  | 0.0641              | 0.0406     | 0.0950     | 0.7912      |
| <i>Shapiro-Wilk normality test</i>                     |         |                     |            |            |             |
| W                                                      | 0.9199  | 0.9202              | 0.8723     | 0.9112     | 0.9761      |
| P value                                                | 0.0582  | 0.0034              | 0.0194     | 0.0375     | 0.8153      |
| <i>KS normality test</i>                               |         |                     |            |            |             |

|                                                               |                                            |                   |            |                    |        |
|---------------------------------------------------------------|--------------------------------------------|-------------------|------------|--------------------|--------|
| KS distance                                                   | 0.1943                                     | 0.1654            | 0.2120     | 0.1491             | 0.1087 |
| P value                                                       | 0.0197                                     | 0.0025            | 0.0317     | 0.1795             | 0.2000 |
| <b>Control</b>                                                |                                            |                   |            |                    |        |
|                                                               | <b>A<math>\beta</math></b><br>(25 $\mu$ M) | <b>Compound 7</b> |            | <b>Compound 11</b> |        |
|                                                               |                                            | 10 $\mu$ M        | 50 $\mu$ M | 10 $\mu$ M         |        |
| <b><i>D'Agostino &amp; Pearson omnibus normality test</i></b> |                                            |                   |            |                    |        |
| K2                                                            | 0.3732                                     | 2.045             | 3.580      | 0.008512           | 1.127  |
| P value                                                       | 0.8298                                     | 0.3596            | 0.1670     | 0.9958             | 0.5691 |
| <b><i>Shapiro-Wilk normality test</i></b>                     |                                            |                   |            |                    |        |
| W                                                             | 0.9466                                     | 0.8570            | 0.9313     | 0.9926             | 0.9465 |
| P value                                                       | 0.6529                                     | 0.0888            | 0.4935     | 0.9981             | 0.6517 |
| <b><i>KS normality test</i></b>                               |                                            |                   |            |                    |        |
| KS distance                                                   | 0.1566                                     | 0.2676            | 0.2111     | 0.1321             | 0.2078 |
| P value                                                       | 0.2000                                     | 0.0625            | 0.2000     | 0.2000             | 0.2000 |
